# Supplementary material
Source: PubMed Central journal article supplement (PMC1838513)

A

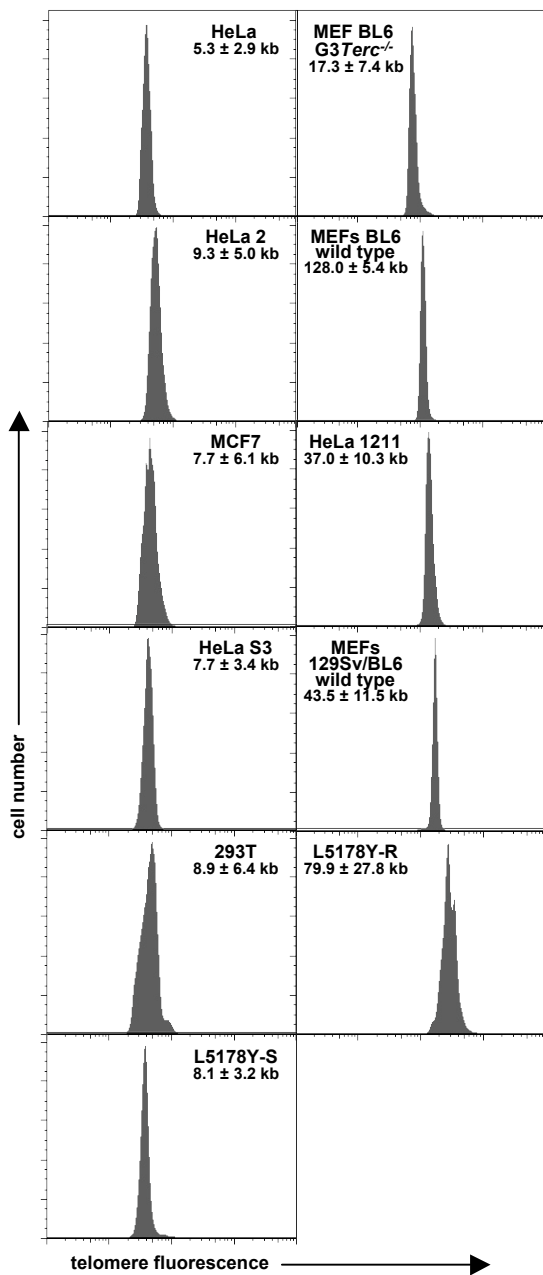

B

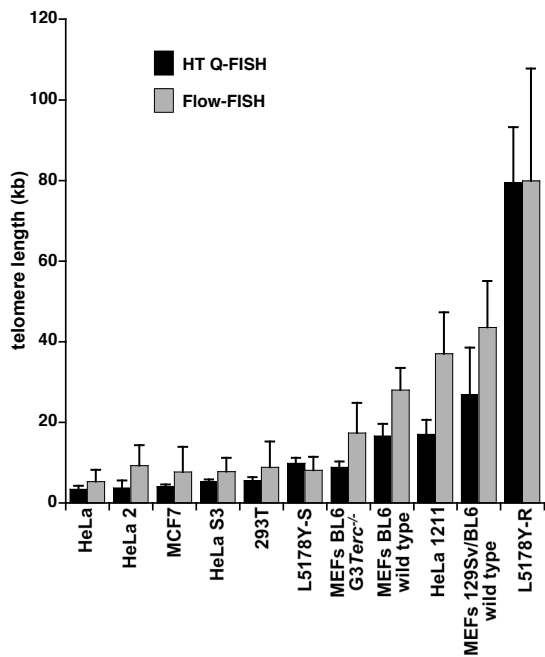

C

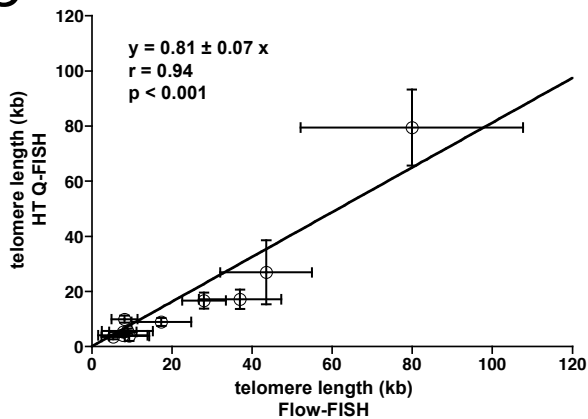

Supplement: pnas_0609367104_1.pdf [file pnas_0609367104_1.pdf]

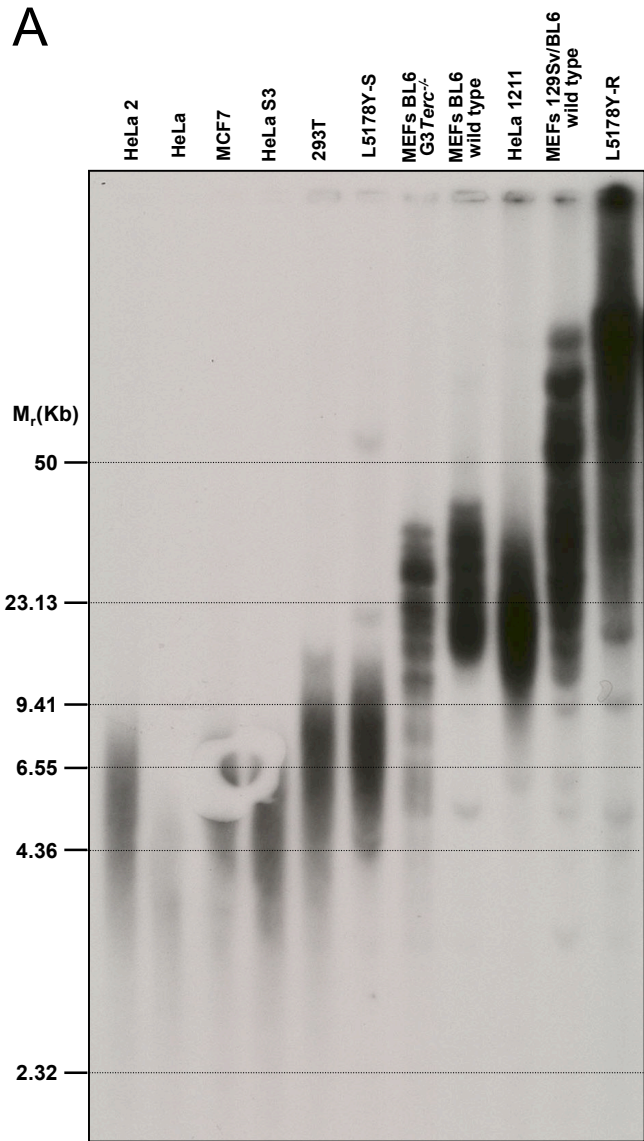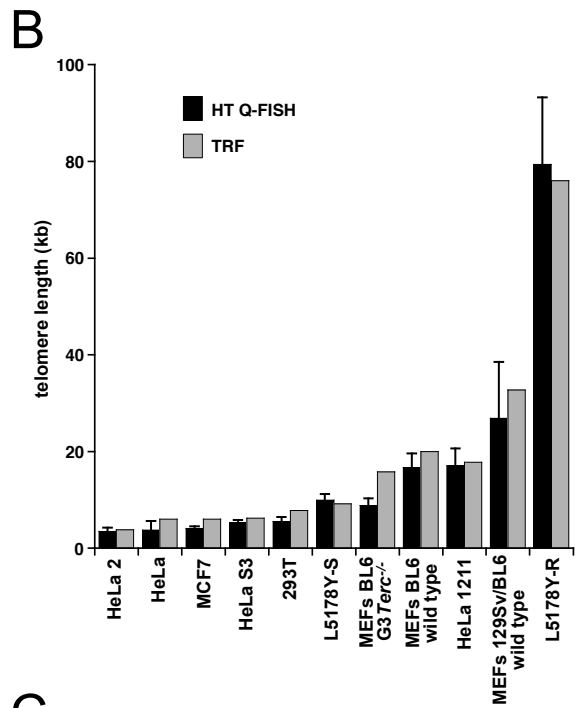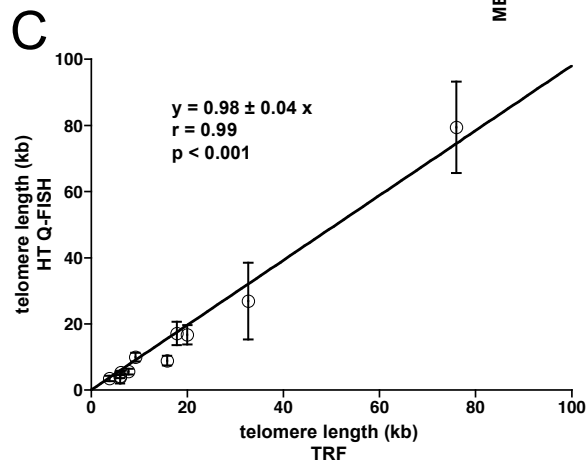

Supplement: pnas_0609367104_2.pdf [file pnas_0609367104_2.pdf]

**A**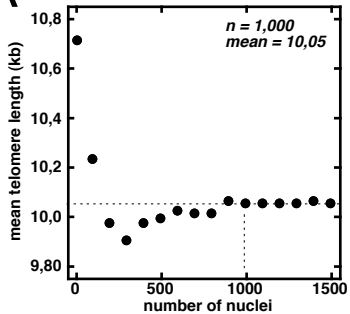**B**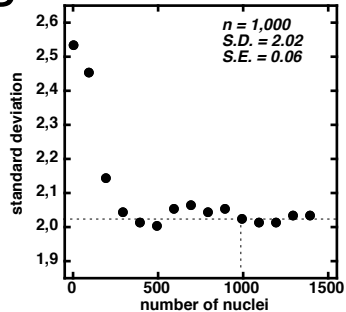**C**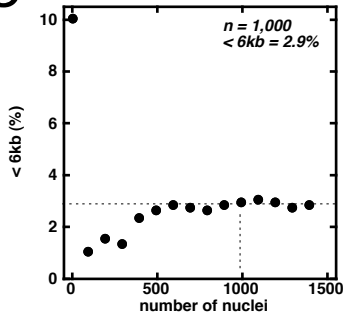

Supplement: pnas_0609367104_3.pdf [file pnas_0609367104_3.pdf]

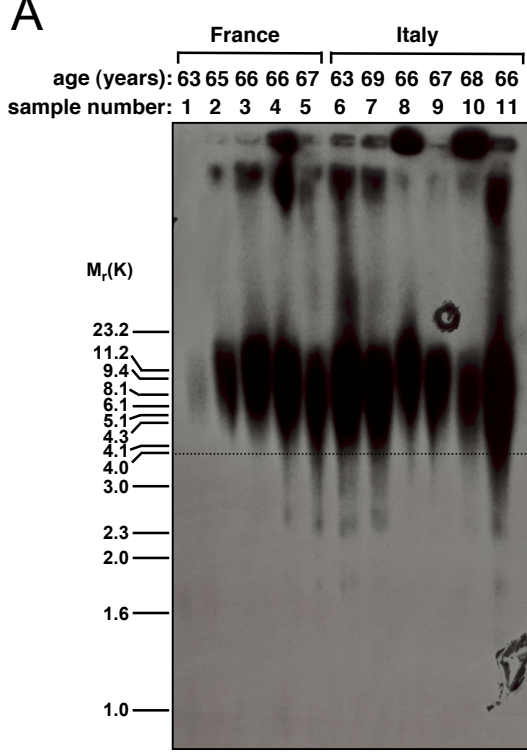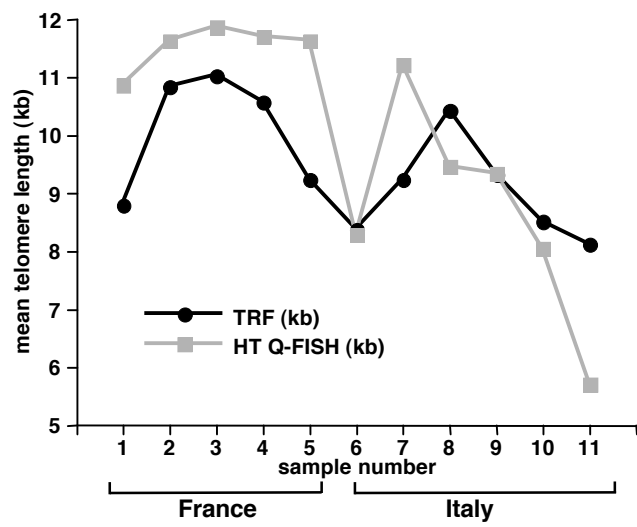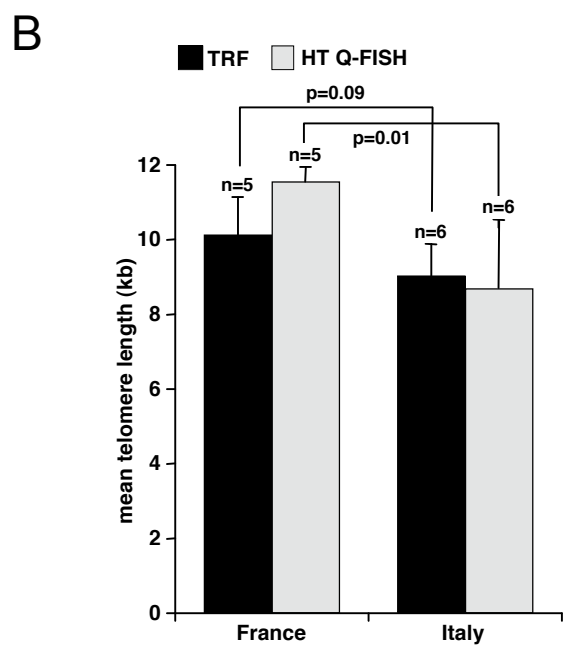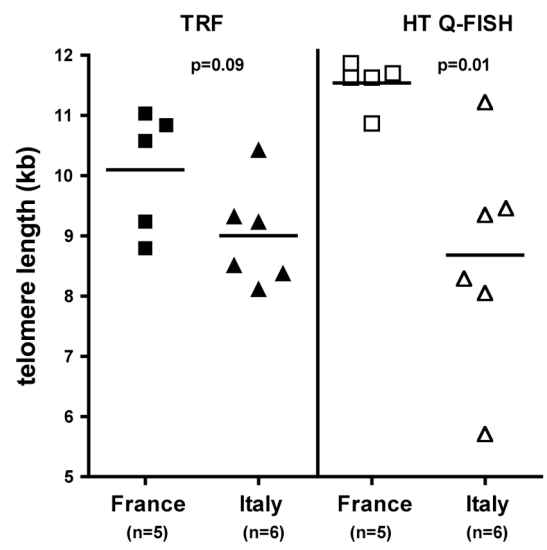

Supplement: pnas_0609367104_4.pdf [file pnas_0609367104_4.pdf]

**A**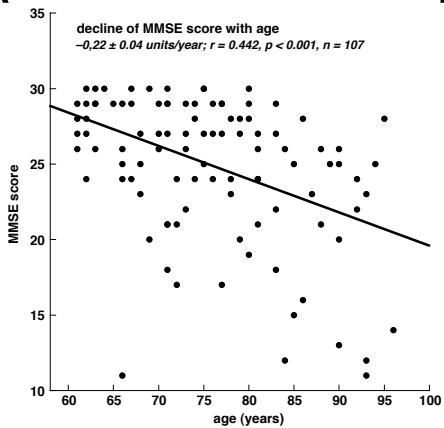**B**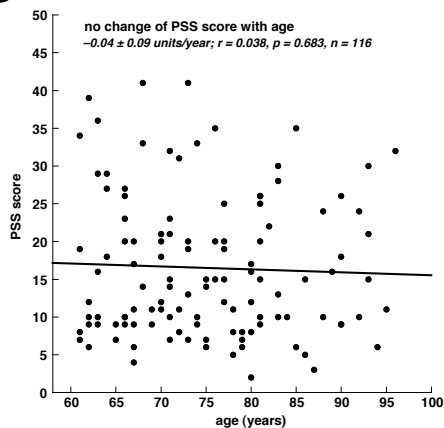**C**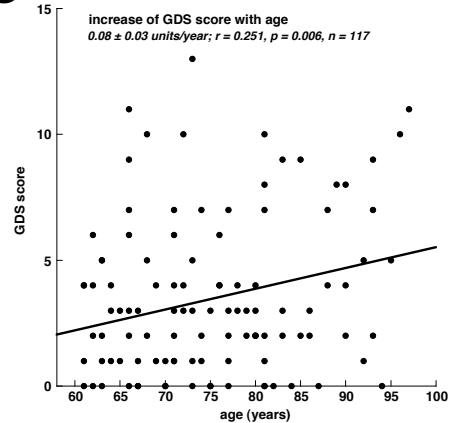**D**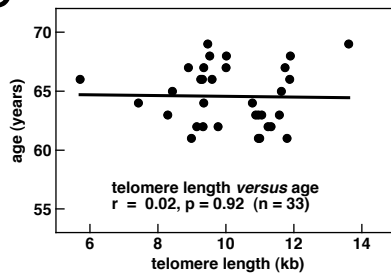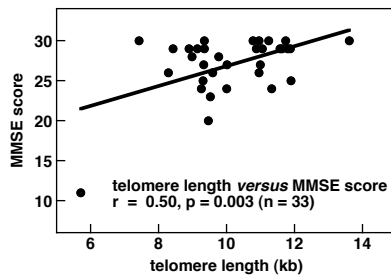**E**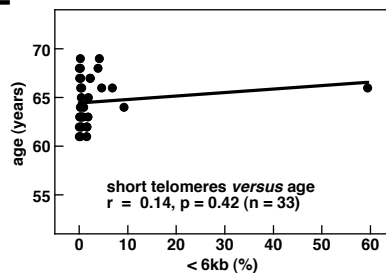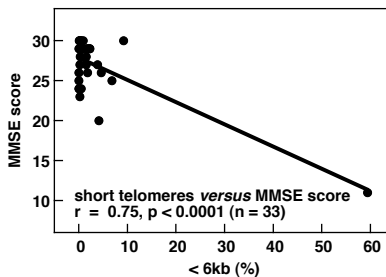

Supplement: pnas_0609367104_5.pdf [file pnas_0609367104_5.pdf]
